# Supplementary material for: The Itinerary of Autophagosomes: From Peripheral Formation to Kiss-and-Run Fusion with Lysosomes
Source: PubMed Central journal article supplement (PMC2329914; doi:10.1111/j.1600-0854.2008.00701.x), 2008-01-30

Suppl. Fig. 2

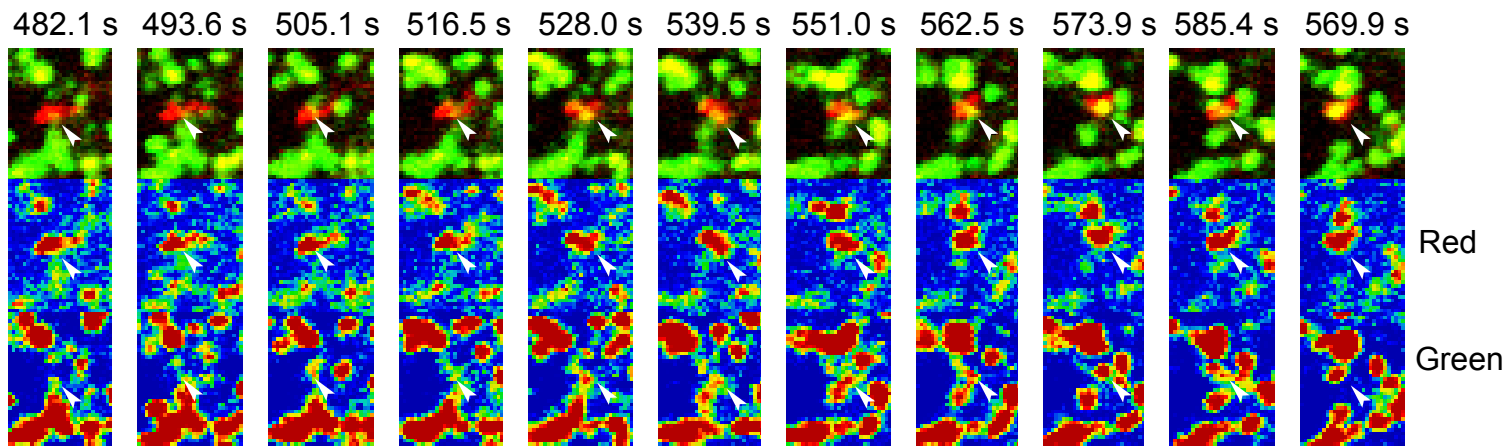

Supplement: tra0009-0574-SD2.pdf [file tra0009-0574-SD2.pdf]
